# Supplementary material for: Value of Preoperative Modified Body Mass Index in Predicting Postoperative 1-Year Mortality
Source: PubMed Central journal article supplement (PMC5854572; doi:10.1038/s41598-018-22886-6), 2018-03-15
Supplement: 41598_2018_22886_MOESM1_ESM.pdf [file 41598_2018_22886_MOESM1_ESM.pdf]

## **Value of Preoperative Modified Body Mass Index in Predicting Postoperative 1-Year Mortality**

Tak Kyu Oh<sup>1,2</sup>, Jaebong Lee<sup>3</sup>, Jung-Won Hwang<sup>2</sup>, Sang-Hwan Do<sup>2</sup>, Young-Tae Jeon<sup>2</sup>, Jin Hee Kim<sup>2</sup>, Kooknam Kim<sup>2</sup>, In-Ae Song<sup>1,2\*</sup>

<sup>1</sup> Interdepartment of Critical Care Medicine, Seoul National University Bundang Hospital, 82, Gumi-ro 173 Beon-gil, Bundang-gu, Seongnam-si, Gyeonggi-do, Korea 463-707

<sup>2</sup> Department of Anesthesiology and Pain Medicine, Seoul National University Bundang Hospital, 82, Gumi-ro 173 Beon-gil, Bundang-gu, Seongnam-si, Gyeonggi-do, Korea 463-707

<sup>3</sup> Medical Research Collaborating Center, Seoul National University Bundang Hospital, 82, Gumi-ro 173 Beon-gil, Bundang-gu, Seongnam-si, Gyeonggi-do, Korea 463-707

### **Correspondence and reprint requests:**

\*In-Ae Song, MD, PhD

Department of Anesthesiology and Pain Medicine, Seoul National University Bundang Hospital, 166, Gumi-ro, Bundang-gu, Seongnam 463-707, Korea

Tel: 82-31-787-7499, Fax: 82-31-787-4063, Email: songoficu@outlook.kr

Supplemental table 1. Multivariate logistic regression analysis for one-year mortality regarding three preoperative variables (cBMI, mBMI, and albumin)

| Variable                   | (+)<br>cBMI                |                 | (+)<br>mBMI                |                 | (+)<br>Albumin             |                 |
|----------------------------|----------------------------|-----------------|----------------------------|-----------------|----------------------------|-----------------|
|                            | Odds Ratio (95% CI)        | <i>P</i> -value | Odds Ratio (95% CI)        | <i>P</i> -value | Odds Ratio (95% CI)        | <i>P</i> -value |
| <b>Type of operation</b>   |                            |                 |                            |                 |                            |                 |
| Non-cardiovascular surgery | ref                        |                 | ref                        |                 | ref                        |                 |
| Cardiovascular surgery     | 0.631 (0.498-0.801)        | <0.001          | 0.688 (0.540-0.877)        | 0.003           | 0.634 (0.498-0.808)        | <0.001          |
| <b>Gender</b>              |                            |                 |                            |                 |                            |                 |
| Male                       | ref                        |                 | ref                        |                 | ref                        |                 |
| Female                     | 0.539 (0.494-0.588)        | <0.001          | 0.540 (0.494-0.591)        | <0.001          | 0.538 (0.492-0.588)        | <0.001          |
| Age (yr)                   | 1.041 (1.038-1.045)        | <0.001          | 1.032 (1.028-1.036)        | <0.001          | 1.035 (1.031-1.038)        | <0.001          |
| cBMI (kg/m <sup>2</sup> )  | <b>0.847</b> (0.836-0.858) | <0.001          |                            |                 |                            |                 |
| mBMI                       |                            |                 | <b>0.995</b> (0.995-0.995) | <0.001          |                            |                 |
| Albumin (g/dl)             |                            |                 |                            |                 | <b>0.230</b> (0.214-0.247) | <0.001          |
| <b>Diabetes mellitus</b>   |                            |                 |                            |                 |                            |                 |
| No                         | ref                        |                 | ref                        |                 | ref                        |                 |
| Yes                        | 1.079 (0.969-1.203)        | 0.167           | 1.063 (0.950-1.190)        | 0.285           | 0.978 (0.873-1.094)        | 0.693           |
| <b>Hypertension</b>        |                            |                 |                            |                 |                            |                 |
| No                         | ref                        |                 | ref                        |                 | ref                        |                 |
| Yes                        | 0.635 (0.576-0.701)        | <0.001          | 0.732 (0.662-0.811)        | <0.001          | 0.612 (0.554-0.677)        | <0.001          |

|                               |                        |        |                       |        |                       |        |
|-------------------------------|------------------------|--------|-----------------------|--------|-----------------------|--------|
| History of IHD                |                        |        |                       |        |                       |        |
| No                            | ref                    |        | ref                   |        | ref                   |        |
| Yes                           | 0.757 (0.658-0.871)    | <0.001 | 0.839 (0.726-0.969)   | 0.017  | 0.843 (0.730-0.973)   | 0.019  |
| History of NUD                |                        |        |                       |        |                       |        |
| No                            | ref                    |        | ref                   |        | ref                   |        |
| Yes                           | 0.964 (0.829-1.122)    | 0.639  | 0.954 (0.817-1.114)   | 0.552  | 1.022 (0.876-1.193)   | 0.782  |
| ASA class                     |                        |        |                       |        |                       |        |
| I                             | ref                    |        | ref                   |        | ref                   |        |
| II                            | 3.714 (3.211-4.295)    | <0.001 | 3.052 (2.634-3.537)   | <0.001 | 2.749 (2.372-3.186)   | <0.001 |
| III                           | 11.796 (9.915-14.034)  | <0.001 | 6.454 (5.393-7.722)   | <0.001 | 5.651 (4.716-6.772)   | <0.001 |
| IV, V, VI                     | 31.919 (21.579-47.215) | <0.001 | 13.959 (9.238-21.091) | <0.001 | 10.594 (6.970-16.102) | <0.001 |
| History of general anesthesia |                        |        |                       |        |                       |        |
| No                            | ref                    |        | ref                   |        | ref                   |        |
| Yes                           | 1.408 (1.292-1.534)    | <0.001 | 1.305 (1.194-1.425)   | <0.001 | 1.270 (1.162-1.387)   | <0.001 |
| Type of anesthesia            |                        |        |                       |        |                       |        |
| General anesthesia            | ref                    |        | ref                   |        | ref                   |        |
| Regional anesthesia           | 0.600 (0.516-0.697)    | <0.001 | 0.550 (0.472-0.641)   | <0.001 | 0.495 (0.425-0.576)   | <0.001 |
| Monitored anesthesia care     | 1.125 (1.015-1.245)    | 0.024  | 1.086 (0.978-1.207)   | 0.124  | 1.140 (1.026-1.267)   | 0.015  |
| Local anesthesia              | 3.446 (1.003-11.841)   | 0.049  | 2.760 (0.738-10.330)  | 0.132  | 3.226 (0.868-11.991)  | 0.080  |
| Postoperative ICU admission   |                        |        |                       |        |                       |        |
| No                            | Ref                    |        | ref                   |        | ref                   |        |

|     |                     |        |                     |        |                     |        |
|-----|---------------------|--------|---------------------|--------|---------------------|--------|
| Yes | 2.103 (1.825-2.422) | <0.001 | 1.680 (1.452-1.943) | <0.001 | 1.728 (1.493-2.000) | <0.001 |
|-----|---------------------|--------|---------------------|--------|---------------------|--------|

---

cBMI, Conventional Body Mass Index; mBMI, modified Body Mass Index; IHD, Ischemic Heart Disease; NUD, Neurologic Disease; ASA, American Society of Anesthesiologists; ICU, Intensive Care Unit
